# Supplementary material for: Emerging Trends and Hotspots in Tai Chi Fall Prevention: Analysis and Visualization
Source: MDPI journal article supplement (doi:10.3390/ijerph19148326), 2022-07-07
Supplement: s1 [file s1]

## Supplementary

**Table S1.** Table of the specific search process.

| Set | Results | Topic                                           | Set | Results | Topic                                                                                                                            |
|-----|---------|-------------------------------------------------|-----|---------|----------------------------------------------------------------------------------------------------------------------------------|
| #1  | 2739    | "Accidental Fall"                               | #12 | 2595    | "Tai Chi"                                                                                                                        |
| #2  | 241954  | "Fall"                                          | #13 | 47      | "Tai Ji Quan"                                                                                                                    |
| #3  | 2839    | "Fall*, Accidental"                             | #14 | 8       | "Chi, Tai"                                                                                                                       |
| #4  | 1930    | "Fall and Slip"                                 | #15 | 51      | "Taichi"                                                                                                                         |
| #5  | 44400   | "Fall Risk"                                     | #16 | 53      | "Taijiquan"                                                                                                                      |
| #6  | 46      | "Risk*, Fall"                                   | #17 | 368     | "Tai Chi Chuan"                                                                                                                  |
| #7  | 14471   | "Fall Prevention"                               | #18 | 4       | "Ji Quan, Tai"                                                                                                                   |
| #8  | 10      | "Prevention*, Fall"                             | #19 | 3       | "Tai-yi"                                                                                                                         |
| #9  | 242109  | #8 OR #7 OR #6 OR #5 OR #4 OR #3<br>OR #2 OR #1 | #20 | 2875    | #19 OR #18 OR #17 OR #16 OR #15 OR #14<br>OR #13 OR #12 OR #11 OR #10                                                            |
| #10 | 84      | "Tai-ji"                                        | #21 | 683     | (#8 OR #7 OR #6 OR #5 OR #4 OR #3 OR #2<br>OR #1) AND (#19 OR #18 OR #17 OR #16<br>OR #15 OR #14 OR #13 OR #12 OR #11 OR<br>#10) |
| #11 | 230     | "Taiji"                                         |     |         |                                                                                                                                  |

**Table S2.** Table of the Merged Keywords.

| Set | Keywords        | Merged keywords                                                                                                                                       |
|-----|-----------------|-------------------------------------------------------------------------------------------------------------------------------------------------------|
| 1   | tai chi         | chuan, tai chi chuan, tai chi exercise, tai ji quan, chi, tai ji, taichi, ji quan                                                                     |
| 2   | people          | human                                                                                                                                                 |
| 3   | risk            | falls risk, fall risk, risk factor                                                                                                                    |
| 4   | elderly         | aging, older adult, aged, older person, elderly people, older people, elderly person, age, dwelling older adult, older, elderly adult, elderly faller |
| 5   | fall prevention | preventing fall, falls prevention, fall prevention, falls in the elderly, prevention                                                                  |
| 6   | injury          | injurious fall                                                                                                                                        |
| 7   | trial           | therapy                                                                                                                                               |

**Table S3.** Ranking of co-cited reference cluster.

| Number | Silhouette | Name                        |
|--------|------------|-----------------------------|
| 0      | 0.752      | One-leg stance              |
| 1      | 0.696      | Aging population            |
| 2      | 0.847      | People                      |
| 3      | 0.825      | Parkinsons disease          |
| 4      | 0.944      | Muscle activation profile   |
| 5      | 0.801      | Elderly-a review            |
| 6      | 0.758      | Physical therapy            |
| 7      | 0.811      | Physical function           |
| 8      | 0.929      | Physical benefit            |
| 9      | 0.829      | Abridgrd Cochrane           |
| 10     | 0.985      | Vestibular rehabilitation   |
| 11     | 0.974      | Parkinsons disease          |
| 12     | 0.995      | Health outcome              |
| 13     | 0.97       | Participant characteristics |
| 14     | 0.98       | Prevention service          |
| 15     | 0.986      | Evidence show               |
| 16     | 0.914      | Stair ascent                |
| 19     | 0.996      | Exercise program            |
| 20     | 0.997      | Care facilities             |
| 21     | 0.97       | Health fitness professional |

**Table S4.** The primary themes of Tai Chi fall prevention field.

| Name | Theme                                                                                                                                                                                                                                                                                                                                         |
|------|-----------------------------------------------------------------------------------------------------------------------------------------------------------------------------------------------------------------------------------------------------------------------------------------------------------------------------------------------|
| i    | Targeted Therapy (Parkinson's disease, vestibular rehabilitation, fracture, frailty <sup>1</sup> , osteoarthritis, osteoporosis, stroke)                                                                                                                                                                                                      |
| ii   | Community Fall Prevention (physical therapy, exercise program, home based exercise, quality of life, prevention service, care facilities, health fitness professional)                                                                                                                                                                        |
| iii  | Research Paradigm (one-leg stance, gait, balance control, postural control, proprioception, bone mineral density, strength <sup>2</sup> , muscle activation profile, participant characteristics, aging population, elderly, women, evidence show, randomized controlled trial, meta-analysis, controlled trial, multifactorial intervention) |
| iv   | Psychological Factors (cognitive impairment, dementia)                                                                                                                                                                                                                                                                                        |

<sup>1</sup> The results of theme i include "frailty" and "disability", but since these two words are similar in meaning, we only present "frailty" in the table.

<sup>2</sup> The results of theme iii include "strength" and "muscle strength", but since these two words are similar in meaning, we only present "strength" in the table.
